# Supplementary material for: Bismuth exposure affects morpho-physiological performances and the ionomic profile in garden cress (Lepidium sativum L.) plants
Source: Frontiers journal article supplement (doi:10.3389/fenvs.2023.1221573), 2023-06-29
Supplement: Table_1.DOCX [file Table_1.DOCX]

Supplementary Material

Bismuth exposure affects morpho-physiological performances and ionomic profile in garden cress (*Lepidium sativum* L.) plants

**Authors:**

Fabrizio Pietrinia,b, Laura Passatorea,b, Serena Carlonia,b, Lorenzo Massimic,d, Maria Luisa Astolfie,f, Chiara Giustoa,c  , Massimo Zacchinia,b*****

**Affiliation:**

aResearch Institute on Terrestrial Ecosystems (IRET), National Research Council of Italy (CNR), via Salaria km 29.300, 00015 Monterotondo Scalo (Roma) – Italy

bNBFC, National Biodiversity Future Center S.c.a.r.l., Piazza Marina 61 (c/o palazzo Steri) 90133 Palermo, Italy

cDepartment of Environmental Biology, Sapienza University of Rome, P.le Aldo Moro 5, 00185, Rome, Italy

dResearch Institute of Atmospheric Pollution Research, National Research Council of Italy (CNR), via Salaria, Km 29.300, Monterotondo Scalo (Rome), 00015, Italy

eDepartment of Chemistry, Sapienza University of Rome, P.le Aldo Moro 5, 00185, Rome, Italy

fCIABC, Sapienza University of Rome, P.le Aldo Moro 5, 00185 Rome, Italy

***Corresponding author**:

Ph: ++390690672537

Fax: ++390690672990

E-mail: [massimo.zacchini@cnr.it](mailto:massimo.zacchini@cnr.it)

Table S1. Element concentration (g Kg-1 dw) in roots of garden cress (*Lepidium sativum* L.) plants grown in pots filled with soil supplied with bismuth nitrate (0 mg Kg-1, control; 30 mg Kg-1; 121 mg Kg-1; 485 mg Kg-1) for 21 days in controlled conditions in growth chamber. Mean data (n=4 ±S.E.) are shown (nd= not detectable).

Table S2. Element concentration (g Kg-1 dw) in shoots of garden cress (*Lepidium sativum* L.) plants grown in pots filled with soil supplied with bismuth nitrate (0 mg Kg-1, control; 30 mg Kg-1; 121 mg Kg-1; 485 mg Kg-1) for 21 days in controlled conditions in growth chamber. Mean data (n=4 ±S.E.) are shown (nd= not detectable).
